# Supplementary material for: The endogenous HBZ interactome in ATL leukemic cells reveals an unprecedented complexity of host interacting partners involved in RNA splicing
Source: Front Immunol. 2022 Aug 1;13:939863. doi: 10.3389/fimmu.2022.939863 (PMC9376625; doi:10.3389/fimmu.2022.939863)
Supplement: Supplementary Data Sheet 1 — (1) List of HBZ potential protein partners. (2) Over-represented top 10 signaling pathways in 249 putative HBZ interactors. (3) Top 10 enriched pathways for cluster 2 proteins. (4) Top 10 enriched pathways for cluster 3 proteins. [file Table_1.xlsx]

## Sheet: Content
1	List of HBZ potential protein partners. For each interactor are reported: the SDS-PAGE apparent molecular weights, protein name, gene name, Uniprot code, molecular weight and the number of identified peptides. In parentheses are indicated the peptides above the peptide score threshold automatically determined by Mascot. kDa: kilo Dalton
2	Over-represented top 10 signaling pathways in 249 putative HBZ interactors
3	Top 10 enriched pathways for cluster 2 proteins
4	Top 10 enriched pathways for cluster 3 proteins

## Sheet: 1
List of HBZ potential protein partners
Molecular weights	Protein name	Gene name	Uniprot code	Molecular weight (MW)	# Peptides
upper than 250 kDa	Serine/arginine repetitive matrix protein 2	SRRM2	Q9UQ35	300	100(62)
	Plectin	PLEC	Q15149	500	65(52)
	Pre-mRNA-processing-splicing factor 8	PRPF8	Q6P2Q9	273	46(36)
	E3 ubiquitin-protein ligase RBBP6	RBBP6	Q7Z6E9	201	31(24)
	Protein SON	SON	P18583	264	26(21)
	DNA-dependent protein kinase catalytic subunit	PRKDC	P78527	469	18(15)
	NK-tumor recognition protein	NKTR	P30414	165	17(14)
	G patch domain-containing protein 8	GPATCH8	Q9UKJ3	164	11(9)
	Zinc finger protein 638	ZNF638	Q14966	220	6(3)
	E3 SUMO-protein ligase RanBP2	RANBP2	P49792	358	5(3)
	Cytoplasmic dynein 1 heavy chain 1	DYNC1H1	Q14204	532	4(1)
	Zinc finger CCCH domain-containing protein 13	ZC3H13	Q5T200	196	3(3)
	DNA-directed RNA polymerase II subunit RPB1	POLR2A	P24928	217	2(2)
250 - 130 kDa	Apoptotic chromatin condensation inducer in the nucleus	ACIN1	Q9UKV3	150	57(41)
	U5 small nuclear ribonucleoprotein 200 kDa helicase	SNRNP200	O75643	244	42(34)
	Splicing factor 3B subunit 1	SF3B1	O75533	146	39(30)
	Thyroid hormone receptor-associated protein 3	THRAP3	Q9Y2W1	109	30(20)
	Splicing factor 3B subunit 2	SF3B2	Q13435	100	25(15)
	Unconventional myosin-Va	MYO5A	Q9Y4I1	215	20(15)
	RNA helicase aquarius	AQR	O60306	171	24(15)
	Serine/arginine repetitive matrix protein 1	SRRM1	Q8IYB3	102	26(11)
	Clathrin heavy chain 1	CLTC	Q00610	191	18(14)
	Unconventional myosin-VI	MYO6	Q9UM54	150	17(15)
	Serine/threonine-protein kinase PRP4 homolog	PRPF4B	Q13523	117	16(14)
	Supervillin	SVIL	O95425	247	16(11)
	U2 snRNP-associated SURP motif-containing protein	U2SURP	O15042	118	12(9)
	ATP-dependent RNA helicase DHX8	DHX8	Q14562	139	9(6)
	Werner syndrome ATP-dependent helicase	WRN	Q14191	162	8(5)
	Zinc finger CCCH domain-containing protein 18	ZC3H18	Q86VM9	106	7(5)
	PHD and RING finger domain-containing protein 1	PHRF1	Q9P1Y6	179	6(4)
	Replication factor C subunit 1	RFC1	P35251	128	5(2)
	Protein virilizer homolog	VIRMA	Q69YN4	202	6(3)
	Myosin phosphatase Rho-interacting protein	MPRIP	Q6WCQ1	116	4(2)
	SAFB-like transcription modulator	SLTM	Q9NWH9	117	3(2)
	Pre-mRNA-processing factor 40 homolog A	PRPF40A	O75400	108	3(2)
	Cleavage and polyadenylation specificity factor subunit 1	CPSF1	Q10570	161	3(2)
	La-related protein 1	LARP1	Q6PKG0	123	3(2)
130-100 kDa	Bcl-2-associated transcription factor 1	BCLAF1	Q9NYF8	106	34(22)
	116 kDa U5 small nuclear ribonucleoprotein component	EFTUD2	Q15029	109	27(21)
	Cell division cycle 5-like protein	CDC5L	Q99459	92	24(18)
	Pre-mRNA-splicing factor SYF1	XAB2	Q9HCS7	100	26(19)
	Heterogeneous nuclear ribonucleoprotein U	HNRNPU	Q00839	90	25(17)
	LIM domain and actin-binding protein 1	LIMA1	Q9UHB6	85	25(14)
	Pinin	PNN	Q9H307	82	30(18)
	Heterogeneous nuclear ribonucleoprotein U-like protein 2	HNRNPUL2	Q1KMD3	85	25(16)
	Splicing factor 3B subunit 3	SF3B3	Q15393	135	19(15)
	Zinc finger CCCH domain-containing protein 14	ZC3H14	Q6PJT7	83	25(16)
	Matrin-3	MATR3	P43243	94	23(15)
	Splicing factor 3A subunit 1	SF3A1	Q15459	89	23(14)
	Interleukin enhancer-binding factor 3	ILF3	Q12906	95	19(16)
	Peptidyl-prolyl cis-trans isomerase G	PPIG	Q13427	89	20(13)
	Drebrin	DBN1	Q16643	71	18(10)
	Alpha-actinin-4	ACTN4	O43707	104	16(11)
	Heat shock protein HSP 90-beta	HSP90AB1	P08238	83	11(9)
	Nucleolin	NCL	P19338	77	9(6)
	Heterogeneous nuclear ribonucleoprotein R	HNRNPR	O43390	71	12(10)
	Heterogeneous nuclear ribonucleoprotein U-like protein 1	HNRNPUL1	Q9BUJ2	96	13(6)
	DNA repair protein complementing XP-C cells	XPC	Q01831	106	12(8)
	Importin subunit beta-1	KPNB1	Q14974	97	12(7)
	Heat shock protein HSP 90-alpha	HSP90AA1	P07900	85	5(4)
	DNA topoisomerase 1	TOP1	P11387	91	11(6)
	Helicase MOV-10	MOV10	Q9HCE1	114	8(5)
	Pre-mRNA-splicing factor CWC22 homolog	CWC22	Q9HCG8	105	11(7)
	Calcium homeostasis endoplasmic reticulum protein	CHERP	Q8IWX8	104	8(5)
	YTH domain-containing protein 1	YTHDC1	Q96MU7	85	9(7)
	MICOS complex subunit MIC60	IMMT	Q16891	84	7(6)
	RNA-binding protein 25	RBM25	P49756	100	6(5)
	Cactin	CACTIN	Q8WUQ7	87	7(5)
	Pre-mRNA-processing factor 6	PRPF6	O94906	107	7(4)
	Elongation factor 2	EEF2	P13639	95	7(4)
	Zinc finger CCCH domain-containing protein 3	ZC3H3	Q8IXZ2	102	9(2)
	A-kinase anchor protein 17A	AKAP17A	Q02040	81	5(2)
	Pre-mRNA-splicing factor ATP-dependent RNA helicase DHX16	DHX16	O60231	119	4(4)
	Serrate RNA effector molecule homolog	SRRT	Q9BXP5	101	5(4)
	U4/U6.U5 tri-snRNP-associated protein 1	SART1	O43290	90	7(4)
	Heat shock 70 kDa protein 4	HSPA4	P34932	94	3(3)
	Neurabin-2	PPP1R9B	Q96SB3	89	4(4)
	G patch domain-containing protein 1	GPATCH1	Q9BRR8	103	4(3)
	DNA ligase 3	LIG3	P49916	113	4(3)
	Regulator of nonsense transcripts 1	UPF1	Q92900	124	4(3)
	DNA repair protein XRCC1	XRCC1	P18887	69	5(2)
	U4/U6 small nuclear ribonucleoprotein Prp3	PRPF3	O43395	77	4(3)
	DNA damage-binding protein 1	DDB1	Q16531	127	3(2)
	A-kinase anchor protein 8-like	AKAP8L	Q9ULX6	72	2(2)
	Zinc finger RNA-binding protein	ZFR	Q96KR1	117	3(2)
	PAX3- and PAX7-binding protein 1	PAXBP1	Q9Y5B6	105	5(0)
	Double-stranded RNA-specific adenosine deaminase	ADAR	P55265	136	3(2)
	Protein CASC3	CASC3	O15234	77	4(2)
	Cullin-associated NEDD8-dissociated protein 1	CAND1	Q86VP6	136	3(2)
	Protein EFR3 homolog A	EFR3A	Q14156	93	3(2)
	RNA-binding protein 15	RBM15	Q96T37	107	5(1)
	ATP-dependent RNA helicase DHX30	DHX30	Q7L2E3	134	3(2)
100-75 kDa	Polyadenylate-binding protein 1	PABPC1	P11940	71	23(14)
	Probable ATP-dependent RNA helicase DDX17	DDX17	Q92841	80	22(10)
	RNA-binding protein 39	RBM39	Q14498	59	16(12)
	Serine/arginine-rich splicing factor 4	SRSF4	Q08170	57	18(12)
	Nuclear cap-binding protein subunit 1	NCBP1	Q09161	92	17(12)
	Crooked neck-like protein 1	CRNKL1	Q9BZJ0	100	17(13)
	Polyadenylate-binding protein 4	PABPC4	Q13310	71	8(7)
	SNW domain-containing protein 1	SNW1	Q13573	61	15(9)
	Heterogeneous nuclear ribonucleoprotein Q	SYNCRIP	O60506	70	12(11)
	Heat shock 70 kDa protein 1A	HSPA1A	P0DMV8	70	9(7)
	Pre-mRNA-processing factor 17	CDC40	O60508	65	12(8)
	Prelamin-A/C	LMNA	P02545	74	12(8)
	ATP-dependent RNA helicase DDX3X	DDX3X	O00571	73	10(8)
	Raftlin	RFTN1	Q14699	63	9(9)
	RNA-binding protein 14	RBM14	Q96PK6	69	11(7)
	Probable ATP-dependent RNA helicase DDX41	DDX41	Q9UJV9	70	10(6)
	Insulin-like growth factor 2 mRNA-binding protein 1	IGF2BP1	Q9NZI8	63	9(5)
	Protein Red	IK	Q13123	66	6(5)
	DBIRD complex subunit ZNF326	ZNF326	Q5BKZ1	66	8(4)
	U1 small nuclear ribonucleoprotein 70 kDa	SNRNP70	P08621	51	7(4)
	RNA-binding protein FUS	FUS	P35637	53	5(4)
	Probable ATP-dependent RNA helicase DHX35	DHX35	Q9H5Z1	79	5(3)
	Pre-mRNA 3'-end-processing factor FIP1	FIP1L1	Q6UN15	66	5(5)
	Microfibrillar-associated protein 1	MFAP1	P55081	52	6(3)
	Plastin-2	LCP1	P13796	70	6(3)
	Complement decay-accelerating factor	CD55	P08174	41	3(3)
	Coiled-coil domain-containing protein 9	CCDC9	Q9Y3X0	60	3(2)
	WD repeat-containing protein 76	WDR76	Q9H967	70	3(3)
	Spermatid perinuclear RNA-binding protein	STRBP	Q96SI9	73	5(3)
	Pre-mRNA-splicing factor SLU7	SLU7	O95391	63	3(3)
	La-related protein 7	LARP7	Q4G0J3	67	4(2)
	KH domain-containing, RNA-binding, signal transduction-associated protein 1	KHDRBS1	Q07666	48	2(2)
	Cleavage and polyadenylation specificity factor subunit 6	CPSF6	Q16630	59	4(3)
	Heterochromatin protein 1-binding protein 3	HP1BP3	Q5SSJ5	61	2(2)
	Cleavage and polyadenylation specificity factor subunit 3	CPSF3	Q9UKF6	77	2(2)
	Synaptic functional regulator FMR1	FMR1	Q06787	71	3(2)
	Guanine nucleotide-binding protein-like 3	GNL3	Q9BVP2	62	2(2)
70-55 kDa	Nucleolar and spindle-associated protein 1	NUSAP1	Q9BXS6	49	36(24)
	Pleiotropic regulator 1	PLRG1	O43660	57	14(12)
	Heterogeneous nuclear ribonucleoprotein K	HNRNPK	P61978	51	15(12)
	Vimentin	VIM	P08670	53	19(14)
	Heterogeneous nuclear ribonucleoprotein L	HNRNPL	P14866	64	11(9)
	Probable ATP-dependent RNA helicase DDX5	DDX5	P17844	69	15(9)
	Luc7-like protein 3	LUC7L3	O95232	51	10(6)
	Sequestosome-1	SQSTM1	Q13501	48	10(7)
	Pre-mRNA-processing factor 19	PRPF19	Q9UMS4	55	7(7)
	Protein RCC2	RCC2	Q9P258	56	9(8)
	Poly(U)-binding-splicing factor PUF60	PUF60	Q9UHX1	60	9(7)
	Carboxypeptidase M	CPM	P14384	50	13(10)
	Proto-oncogene tyrosine-protein kinase Src	SRC	P12931	60	8(6)
	Splicing factor 3A subunit 3	SF3A3	Q12874	59	11(7)
	H/ACA ribonucleoprotein complex subunit DKC1	DKC1	O60832	58	13(6)
	U4/U6 small nuclear ribonucleoprotein Prp4	PRPF4	O43172	58	9(7)
	Splicing factor U2AF 65 kDa subunit	U2AF2	P26368	53	10(7)
	Caspase activity and apoptosis inhibitor 1	CAAP1	Q9H8G2	38	7(5)
	60 kDa heat shock protein, mitochondrial	HSPD1	P10809	61	7(5)
	Dual specificity protein kinase CLK3	CLK3	P49761	73	5(5)
	Kelch-like ECH-associated protein 1	KEAP1	Q14145	70	6(5)
	Dual specificity protein kinase CLK2	CLK2	P49760	60	6(4)
	Non-POU domain-containing octamer-binding protein	NONO	Q15233	54	8(4)
	T-complex protein 1 subunit theta	CCT8	P50990	60	3(2)
	UV excision repair protein RAD23 homolog B	RAD23B	P54727	43	7(3)
	Coronin-1A	CORO1A	P31146	51	6(3)
	T-complex protein 1 subunit alpha	TCP1	P17987	60	4(4)
	Splicing factor 3A subunit 2	SF3A2	Q15428	49	6(3)
	U4/U6 small nuclear ribonucleoprotein Prp31	PRPF31	Q8WWY3	55	4(3)
	Polypyrimidine tract-binding protein 1	PTBP1	P26599	57	4(2)
55-50 kDa	Heterogeneous nuclear ribonucleoprotein H	HNRNPH1	P31943	49	13(8)
	Polyadenylate-binding protein 2	PABPN1	Q86U42	33	12(8)
	Lymphocyte-specific protein 1	LSP1	P33241	37	8(7)
	Tubulin beta chain	TUBB	P07437	50	9(6)
	RNA-binding protein with serine-rich domain 1	RNPS1	Q15287	34	9(4)
	Nuclease-sensitive element-binding protein 1	YBX1	P67809	36	4(2)
	WD40 repeat-containing protein SMU1	SMU1	Q2TAY7	57	7(3)
	Tubulin alpha-1B chain	TUBA1B	P68363	50	4(3)
	Pre-mRNA-splicing factor RBM22	RBM22	Q9NW64	47	4(3)
50-40 kDa	RNA-binding motif protein, X chromosome	RBMX	P38159	42	16(9)
	Interleukin enhancer-binding factor 2	ILF2	Q12905	43	8(8)
	Serine/arginine-rich splicing factor 6	SRSF6	Q13247	39	13(7)
	Heterogeneous nuclear ribonucleoprotein D0	HNRNPD	Q14103	38	8(5)
	TAR DNA-binding protein 43	TARDBP	Q13148	45	4(2)
40-35 kDa	Heterogeneous nuclear ribonucleoproteins C1/C2	HNRNPC	P07910	34	19(16)
	Putative RNA-binding protein Luc7-like 2	LUC7L2	Q9Y383	46	11(8)
	Heterogeneous nuclear ribonucleoprotein A3	HNRNPA3	P51991-2	37	11(6)
	RNA-binding protein Raly	RALY	Q9UKM9	32	11(7)
	Guanine nucleotide-binding protein G(i) subunit alpha-2	GNAI2	P04899	40	8(7)
	Poly(rC)-binding protein 1	PCBP1	Q15365	37	8(7)
	Heterogeneous nuclear ribonucleoprotein A/B	HNRNPAB	Q99729	30	9(5)
	Guanine nucleotide-binding protein G(o) subunit alpha	GNAO1	P09471-2	40	6(4)
	Tropomodulin-3	TMOD3	Q9NYL9	39	9(6)
	Guanine nucleotide-binding protein G(k) subunit alpha	GNAI3	P08754	40	7(6) 2U
	Pre-mRNA-splicing factor ISY1 homolog	ISY1	Q9ULR0	33	7(5)
	U5 small nuclear ribonucleoprotein 40 kDa protein	SNRNP40	Q96DI7	39	7(6)
	Transcription factor jun-B	JUNB	P17275	36	5(4)
	Pre-mRNA-splicing factor 38A	PRPF38A	Q8NAV1	37	4(4)
	Serine/arginine-rich splicing factor 8	SRSF8	Q9BRL6	33	4(2)
	RNA-binding protein with serine-rich domain 1	RNPS1	Q15287	34	3(2)
	Transcription factor jun-D	JUND	P17535	35	2(2)
35-30 kDa	Heterogeneous nuclear ribonucleoprotein A1	HNRNPA1	P09651	39	14(10)
	Heterogeneous nuclear ribonucleoproteins A2/B1	HNRNPA2B1	P22626	37	12(10)
	Transformer-2 protein homolog alpha	TRA2A	Q13595	33	10(7)
	Transformer-2 protein homolog beta	TRA2B	P62995	34	8(4)
	Glyceraldehyde-3-phosphate dehydrogenase	GAPDH	P04406	36	8(5)
	Serine/arginine-rich splicing factor 10	SRSF10	O75494	31	7(3)
	Serine/arginine-rich splicing factor 5	SRSF5	Q13243	31	4(4)
	F-actin-capping protein subunit alpha-1	CAPZA1	P52907	33	4(4)
	Serine/threonine-protein phosphatase PP1-alpha catalytic subunit	PPP1CA	P62136	37	4(3)
	Heterogeneous nuclear ribonucleoprotein A0	HNRNPA0	Q13151	31	4(2)
	Guanine nucleotide-binding protein G(I)/G(S)/G(T) subunit beta-1	GNB1	P62873	37	5(4)
	Heterogeneous nuclear ribonucleoprotein H3	HNRNPH3	P31942	37	5(5)
	ELAV-like protein 1	ELAVL1	Q15717	36	5(2)
	Arginine and glutamate-rich protein 1	ARGLU1	Q9NWB6	33	6(2)
	Splicing factor U2AF 35 kDa subunit	U2AF1	Q01081	28	4(2)
30-25 kDa	Serine/arginine-rich splicing factor 1	SRSF1	Q07955	28	25(21)
	Serine/arginine-rich splicing factor 7	SRSF7	Q16629	27	15(9)
	Actin, cytoplasmic 1	ACTB	P60709	41	12(9)
	EF-hand domain-containing protein D2	EFHD2	Q96C19	27	8(7)
	U2 small nuclear ribonucleoprotein A'	SNRPA1	P09661	28	10(7)
	Serine/threonine-protein phosphatase PGAM5, mitochondrial	PGAM5	Q96HS1	32	8(5)
	14-3-3 protein epsilon	YWHAE	P62258	29	6(5)
	F-actin-capping protein subunit beta	CAPZB	P47756	31	7(4)
	Serine/arginine-rich splicing factor 2	SRSF2	Q01130	25	6(3)
	14-3-3 protein zeta/delta	YWHAZ	P63104	28	4(3)
	Tropomyosin alpha-4 chain	TPM4	P67936	28	7(5)
	40S ribosomal protein S2	RPS2	P15880	31	8(3)
	Histone H1.3	HIST1H1D	P16402	22	5(3)
	14-3-3 protein gamma	YWHAG	P61981	28	4(3)
	40S ribosomal protein S3	RPS3	Q0Z8U2	27	3(2)
	ADP/ATP translocase 2	SLC25A5	P05141	33	3(2)
	Chromatin target of PRMT1 protein	CHTOP	Q9Y3Y2	26	3(1)
25-20 kDa	Serine/arginine-rich splicing factor 9	SRSF9	Q13242	25	9(8)
	Small nuclear ribonucleoprotein-associated proteins B and B'	SNRPB	P14678	24	3(1)
20-15 kDa	Serine/arginine-rich splicing factor 3	SRSF3	P84103	19	12(7)
	Cysteine and glycine-rich protein 1	CSRP1	P21291	20	2(2)
	RNA-binding protein 8A	RBM8A	Q9Y5S9	20	5(2)
	Peroxiredoxin-1	PRDX1	Q06830	22	3(1)
15 kDa	Protein mago nashi homolog	MAGOH	P61326	17	13(8)
	Histone deacetylase complex subunit SAP18	SAP18	Q3T022	17	15(7)
	Myosin light polypeptide 6	MYL6	P60660	17	8(8)
	40S ribosomal protein S18	RPS18	P62269	18	8(6)
	Myosin regulatory light chain 12A	MYL12A	P19105	20	7(6)
	40S ribosomal protein S16	RPS16	P62249	16	7(5)
	Calmodulin-3	CALM3	P0DP25	17	4(4)
	Protein BUD31 homolog	BUD31	P41223	17	8(2)
	PHD finger-like domain-containing protein 5A	PHF5A	Q7RTV0	12	5(3)
	Peptidyl-prolyl cis-trans isomerase-like 1	PPIL1	Q9Y3C6	18	4(4)
	Small nuclear ribonucleoprotein Sm D2	SNRPD2	P62316	13	5(3)
	40S ribosomal protein S15a	RPS15A	P62244	15	5(4)
	40S ribosomal protein S25	RPS25	P62851	14	4(3)
	Small nuclear ribonucleoprotein Sm D1	SNRPD1	P62314	13	3(3)
	Splicing factor 3B subunit 6	SF3B6	Q9Y3B4	14	3(1)
	60S ribosomal protein L31	RPL31	P62899	14	5(1)
	60S ribosomal protein L22	RPL22	P35268	15	2(2)
	Galectin-1	LGALS1	P09382	15	3(2)
	Nuclear cap-binding protein subunit 2	NCBP2	P52298	18	4(3)
	Peptidyl-prolyl cis-trans isomerase A	PPIA	P62937	18	3(2)
	Cofilin-1	CFL1	P23528	18	2(2)
15-10 kDa	Enhancer of rudimentary homolog	ERH	P84090	12	8(3)

## Sheet: 2
Over-represented top 10 signaling pathways in 249 putative HBZ interactors
Pathway	Description	Size	Expect	Ratio	FDR
R-HSA-72172	mRNA Splicing	191	3.294	26.411	0
R-HSA-109688	Cleavage of Growing Transcript in the Termination Region	67	1.1555	21.636	0
R-HSA-927802	Nonsense-Mediated Decay (NMD)	115	1.9833	8.0673	0.00015408
R-HSA-168255	Influenza Life Cycle	143	2.4662	5.6767	1.7425e-05
R-HSA-6782210	Gap-filling DNA repair synthesis and ligation in TC-NER	65	1.121	8.0285	0.00012112
R-HSA-8950505	Gene and protein expression by JAK-STAT signaling after Interleukin-12 stimulation	39	0.6726	10.407	0.00029312
R-HSA-159231	Transport of Mature mRNA Derived from an Intronless Transcript	40	0.68985	8.6975	0.0029413
R-HSA-5336415	Uptake and function of diphtheria toxin	6	0.10348	28.992	0.0043038
R-HSA-192823	Viral mRNA Translation	89	1.5349	5.212	0.0059272
R-HSA-390466	Chaperonin-mediated protein folding	93	1.6039	4.9878	0.0073603

## Sheet: 3
Top 10 enriched pathways for cluster 2 proteins
Pathway	Description	Size	Expect	Ratio	FDR
R-HSA-72163	mRNA Splicing - Major Pathway	183	1.1098	11.714	0.00075212
R-HSA-195258	RHO GTPase Effectors	316	1.9164	6.2617	7.9292e-05
R-HSA-8950505	Gene and protein expression by JAK-STAT signaling after Interleukin-12 stimulation	39	0.23652	21.14	0.00065999
R-HSA-157858	Gap junction trafficking and regulation	47	0.28504	17.542	0.001303
R-HSA-5696399	Global Genome Nucleotide Excision Repair (GG-NER)	84	0.50943	11.778	0.0013587
R-HSA-2682334	EPH-Ephrin signaling	92	0.55795	10.754	0.0016912
R-HSA-380320	Recruitment of NuMA to mitotic centrosomes	92	0.55795	10.754	0.0016912
R-HSA-168255	Influenza Life Cycle	143	0.86724	8.0716	0.0018811
R-HSA-389958	Cooperation of Prefoldin and TriC/CCT in actin and tubulin folding	30	0.18194	21.985	0.0021564
R-HSA-2029482	Regulation of actin dynamics for phagocytic cup formation	61	0.36994	13.516	0.0022158

## Sheet: 4
Top 10 enriched pathways for cluster 3 proteins
Pathway	Description	Size	Expect	Ratio	FDR
R-HSA-72203	Processing of Capped Intron-Containing Pre-mRNA	243	1.1513	22.583	0
R-HSA-975957	Nonsense Mediated Decay (NMD) enhanced by the Exon Junction Complex (EJC)	115	0.54487	20.188	1.192e-09
R-HSA-6803529	FGFR2 alternative splicing	26	0.12319	48.706	3.84e-07
R-HSA-72649	Translation initiation complex formation	58	0.2748	25.473	1.4983e-06
R-HSA-72695	Formation of the ternary complex, and subsequently, the 43S complex	51	0.24164	24.831	1.6901e-05
R-HSA-72187	mRNA 3'-end processing	58	0.2748	18.195	0.00040391
R-HSA-8851708	Signaling by FGFR2 IIIa TM	19	0.090022	33.325	0.0039717
